# Supplementary material for: Mitotic clustering of pulverized chromosomes from micronuclei
Source: PubMed Central journal article supplement (PMC10307639; doi:10.1038/s41586-023-05974-0), 2023-05-10

## Supplementary information

---

# Mitotic clustering of pulverized chromosomes from micronuclei

---

In the format provided by the  
authors and unedited

## SUPPLEMENTARY INFORMATION GUIDE

### **Mitotic clustering of pulverized chromosomes from micronuclei**

Yu-Fen Lin, Qing Hu, Alice Mazzagatti, Jose Espejo Valle-Inclan, Elizabeth G. Maurais, Rashmi Dahiya, Alison Guyer, Jacob T. Sanders, Justin L. Engel, Giao Chau Nguyen, Daniel Bronder, Samuel F. Bakhoun, Isidro Cortés-Ciriano, and Peter Ly

Corresponding authors: peter.ly@utsouthwestern.edu (P.L.)

icortes@ebi.ac.uk (I.C.-C.)

**Supplementary Figure 1. Raw, unprocessed images of western blots reported in this study.**

**Supplementary Table 1. List of balanced chromothripsis events disrupting cancer driver genes in the PCAWG cohort.**

**Supplementary Table 2. List of oligonucleotide sequences used in this study.**

**Supplementary Video 1. Live-cell imaging of dCas9-SunTag-labeled Y chromosome mis-segregating into a micronucleus.** Y chromosome DYZ1 repeats are labeled with dCas9-SunTag in green; chromatin is labeled with H2B-mCherry in red. Movie shown at 15 min intervals per second.

**Supplementary Video 2. Live-cell imaging of dCas9-SunTag-labeled Y chromosome in micronuclei remaining clustered throughout mitosis.** Y chromosome DYZ1 repeats are labeled with dCas9-SunTag in green; chromatin is labeled with H2B-mCherry in red. Movie shown at 30 min intervals per second.

**Supplementary Video 3. Live-cell imaging of CIP2A-depleted cell exhibiting dispersal of dCas9-SunTag signals upon mitotic entry.** Y chromosome DYZ1 repeats are labeled with dCas9-SunTag in green; chromatin is labeled with H2B-mCherry in red. Movie shown at 15 min intervals per second.

**Supplementary Video 4. Live-cell imaging of micronucleated, HaloTag-labeled CIP2A puncta remaining clustered throughout mitosis.** CIP2A is shown in green; chromatin is labeled with H2B-mCherry in red. Movie shown at 15 min intervals per second.

**Source Data for Figures 1-4 and Extended Data Figures 1-9**

*Supplementary Tables, Supplementary Videos, and Source Data are provided as separate files*

# Supplementary Figure 1

## Extended Data Figure 3a

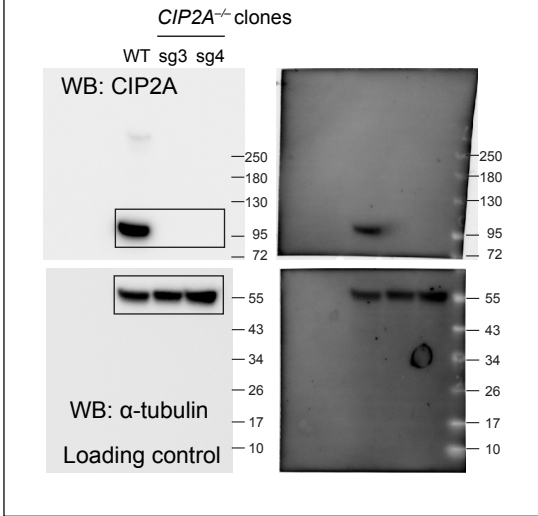

## Extended Data Figure 3g

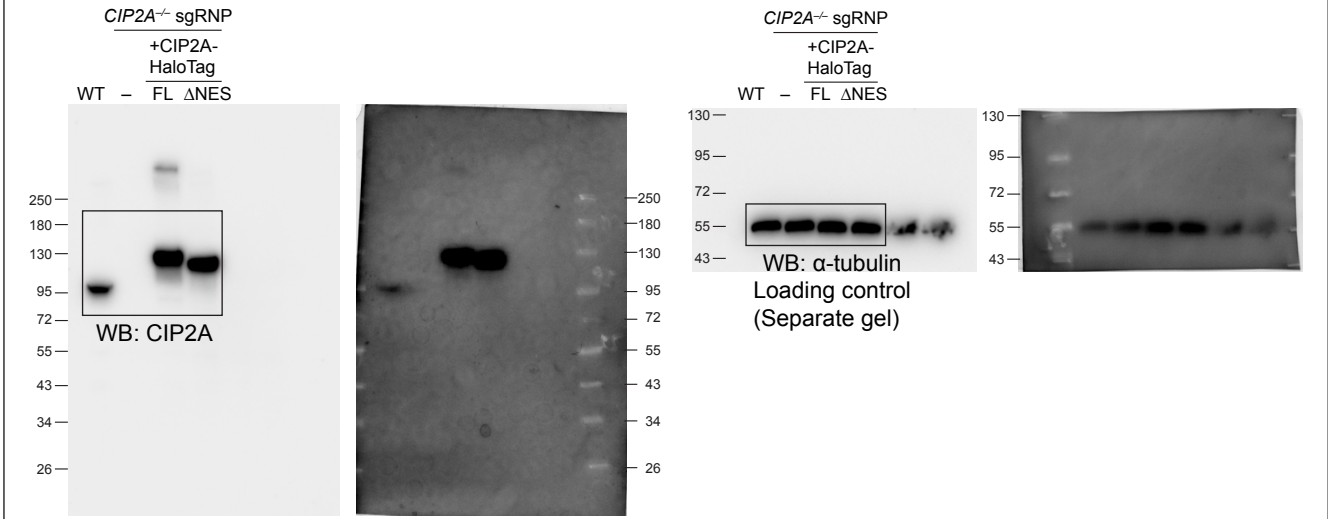

## Figure 2f

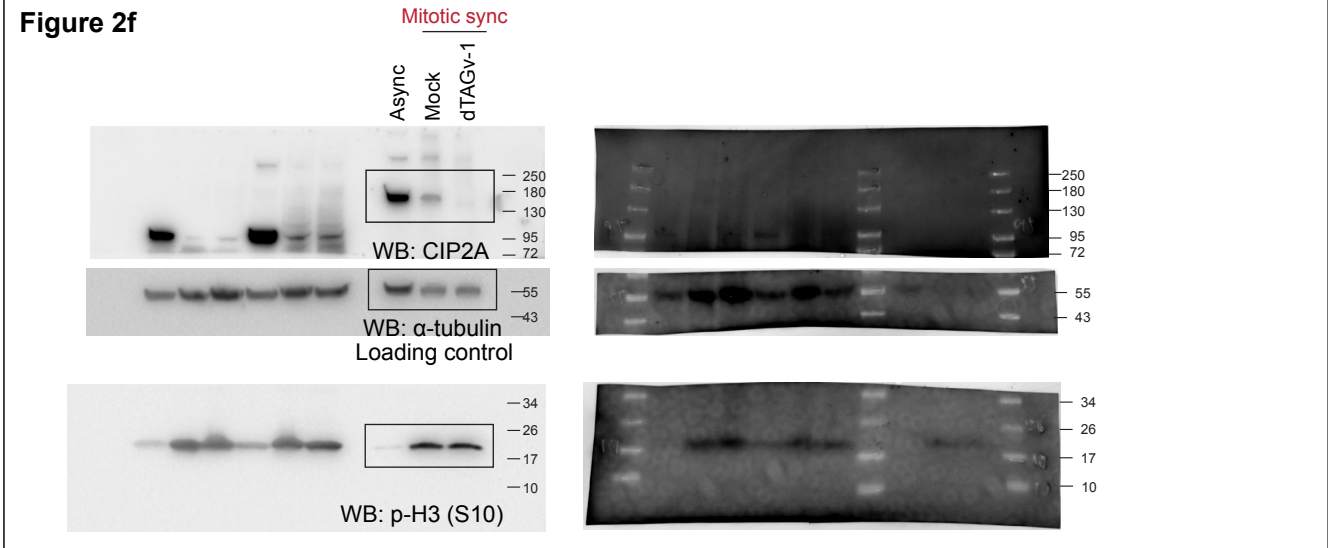

# Supplementary Figure 1 (cont.)

## Extended Data Figure 4b

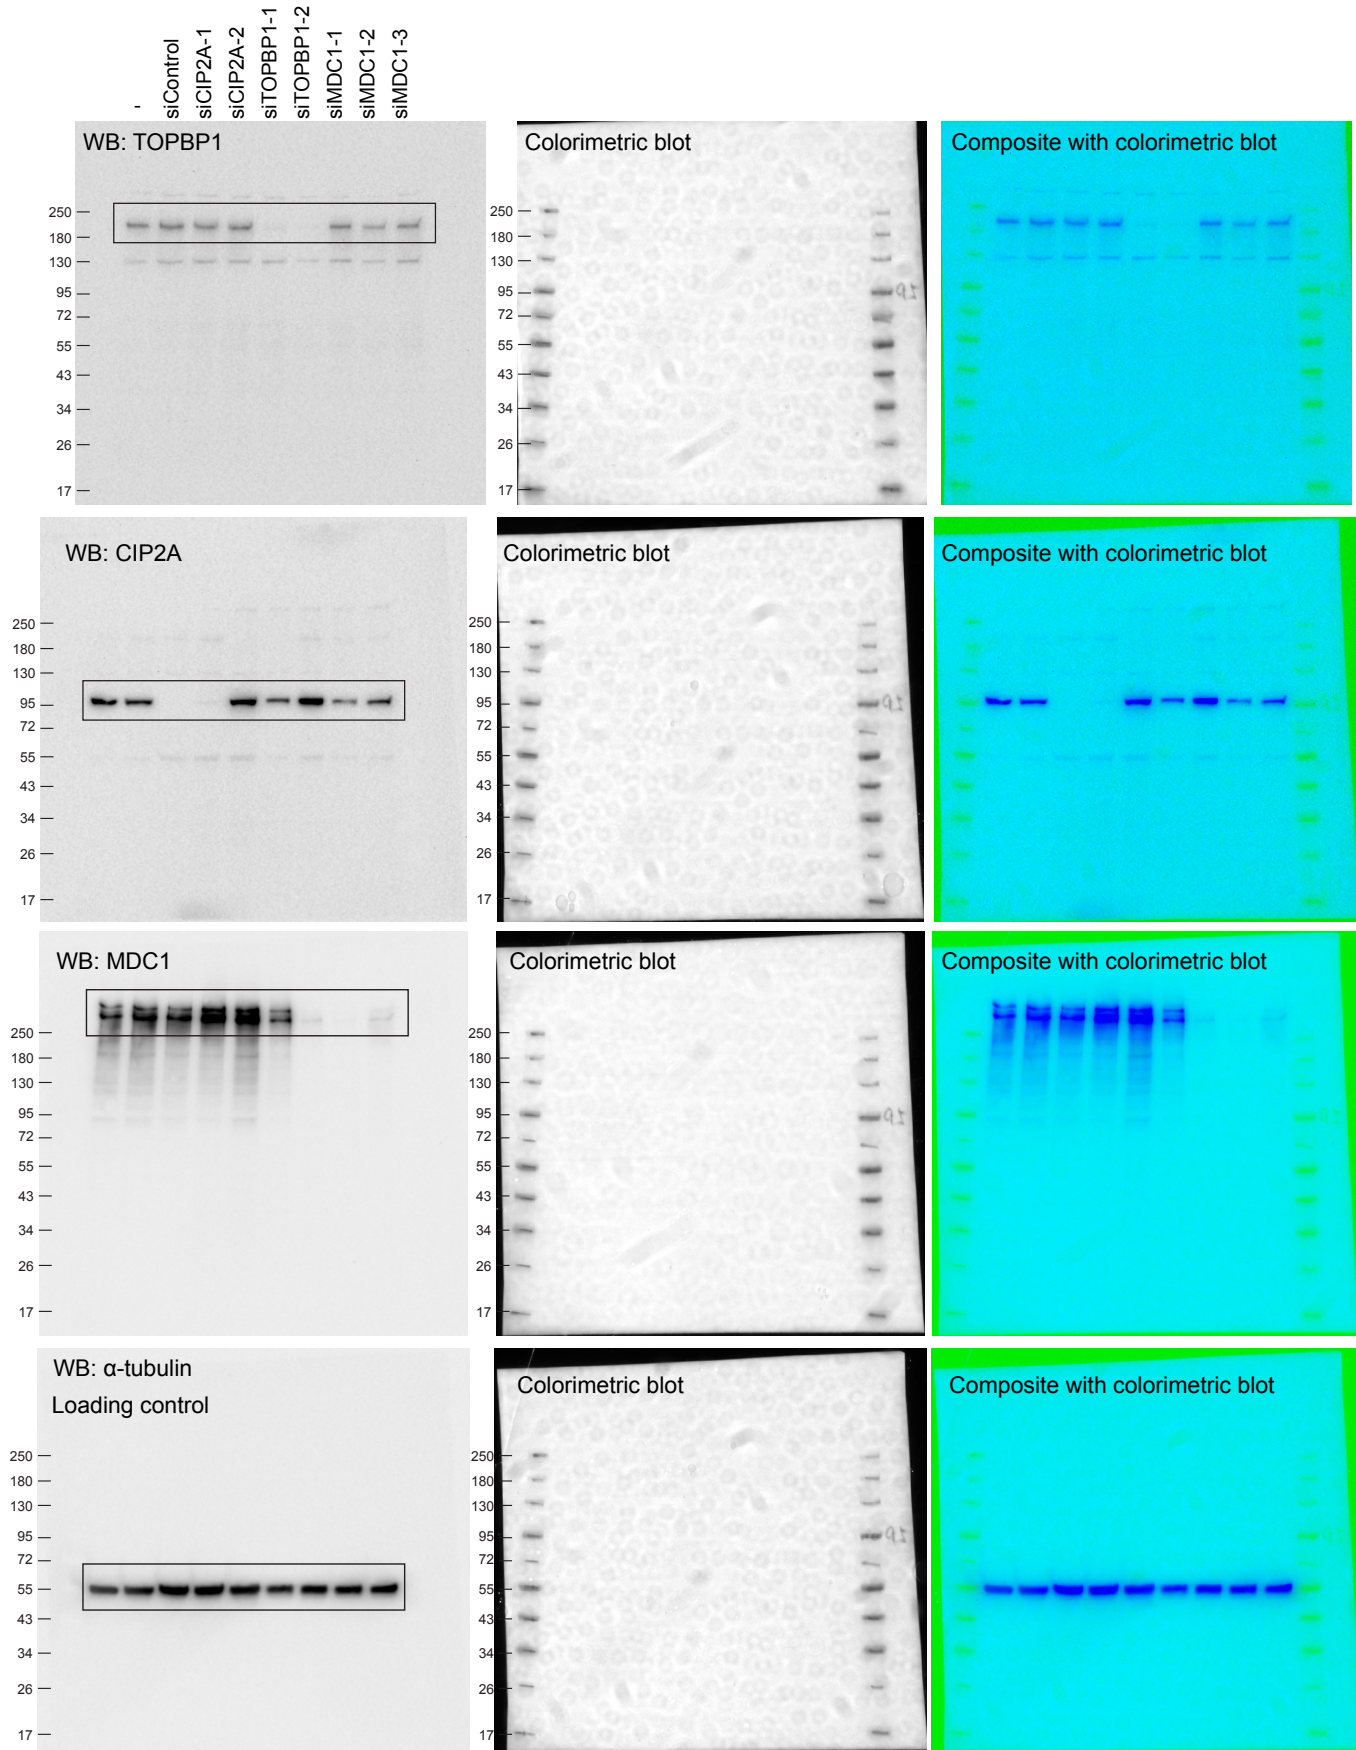

# Supplementary Figure 1 (cont.)

## Extended Data Figure 5a

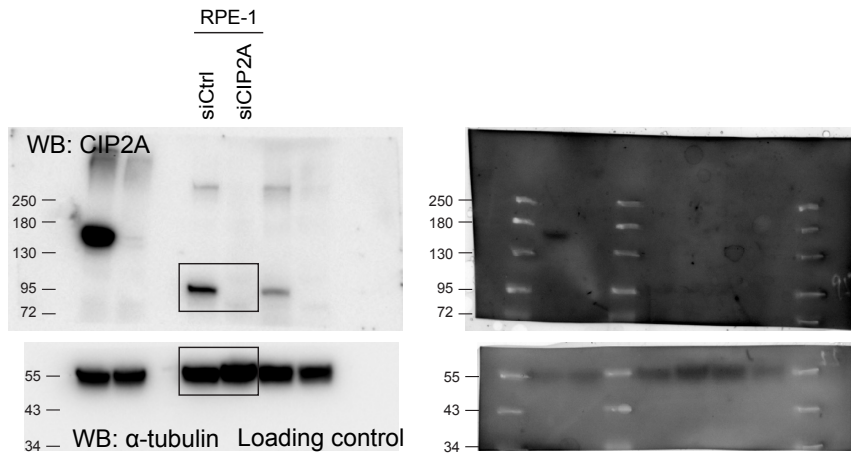

## Extended Data Figure 5h

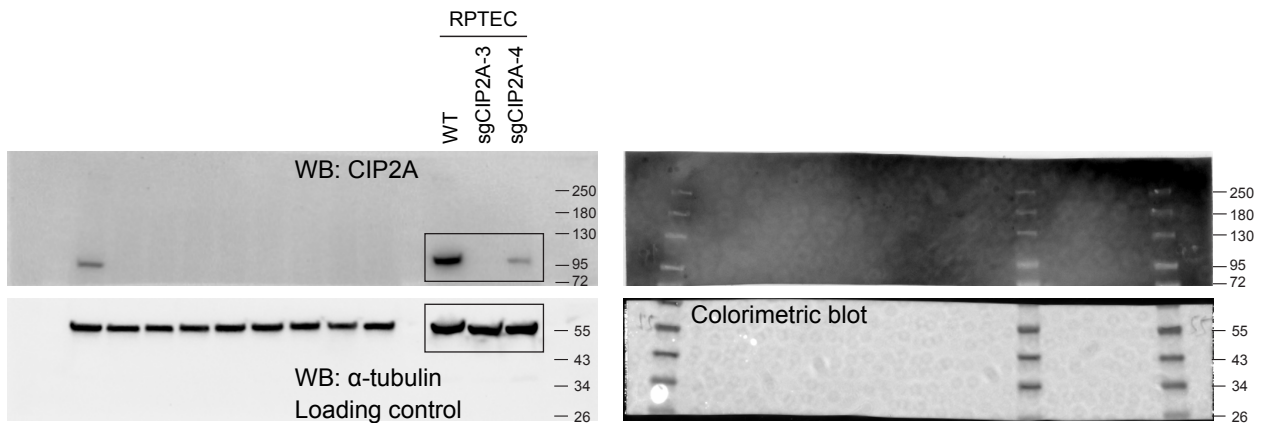

Supplement: 41586_2023_5974_MOESM1_ESM.pdf [file 41586_2023_5974_MOESM1_ESM.pdf]
